# Supplementary material for: Synergic Functions of miRNAs Determine Neuronal Fate of Adult Neural Stem Cells
Source: PubMed Central journal article supplement — Stem Cell Reports. 2017 Mar 16;8(4):1046–61. doi: 10.1016/j.stemcr.2017.02.012 (PMC5390108; doi:10.1016/j.stemcr.2017.02.012), 2017-03-16
Supplement: mmc1.pdf [file mmc1.pdf]

**Stem Cell Reports, Volume 8**

**Supplemental Information**

**Synergic Functions of miRNAs Determine Neuronal Fate of Adult Neural Stem Cells**

**Merixell Pons-Espinal, Emanuela de Luca, Matteo Jacopo Marzi, Ruth Beckervordersandforth, Andrea Armirotti, Francesco Nicassio, Klaus Fabel, Gerd Kempermann, and Davide De Pietri Tonelli**

SUPPLEMENTAL INFORMATION

Supplemental Figures and Figure Legends

Figure S1. Related to Figure 1 and Figure 2.

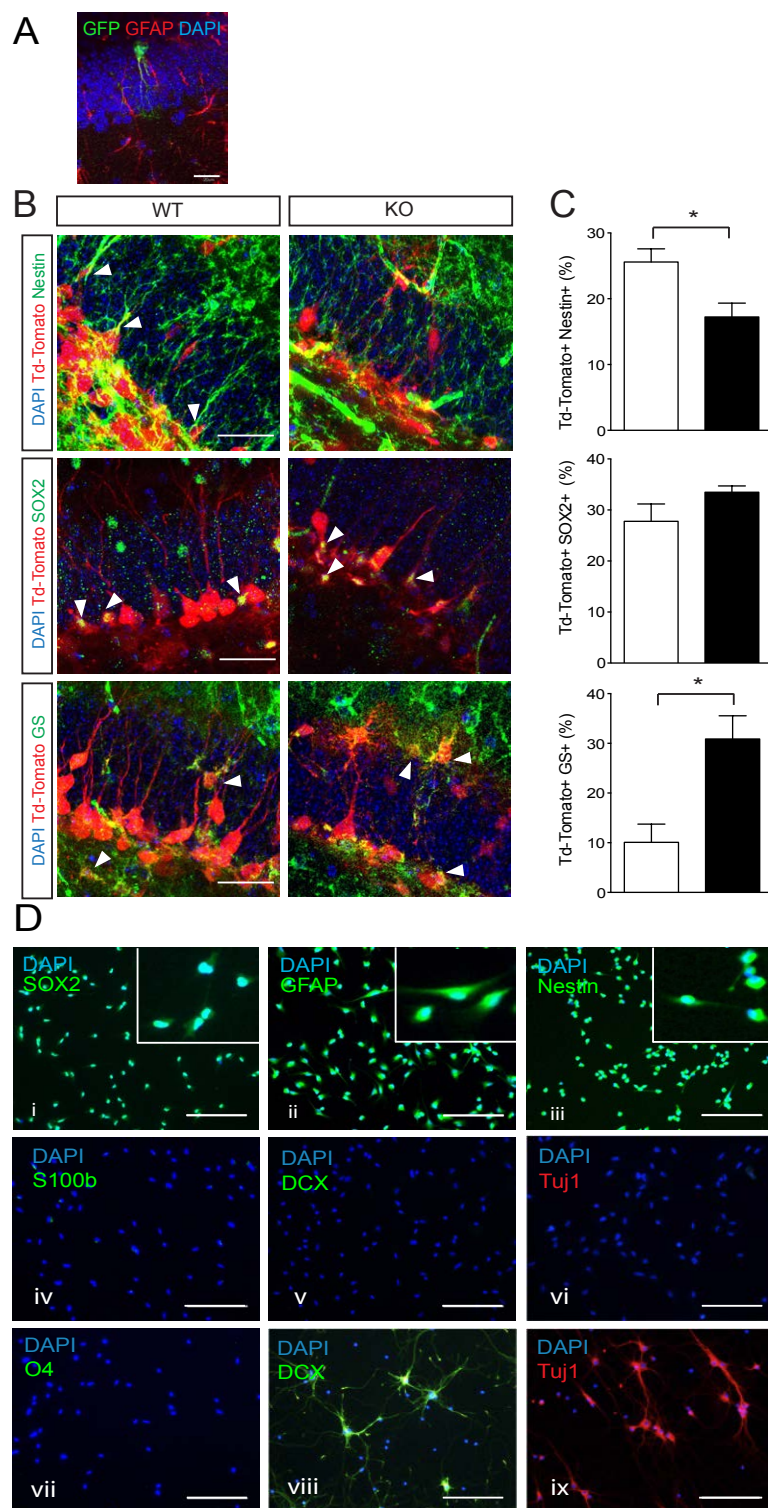

**Figure S1. Characterization of adult neural stem cells subject of the study *in vivo* and *in vitro*.** A: Radial glial cell (type 1 aNSC) labelled with Split-Cre virus 28 days post injection in CAG CAT GFP reporter mice. Scale bar = 20 $\mu$ m. B-C: Representative micrographs (B) and quantification (C) of

recombined Td-Tomato+ cells from *Dicer*<sup>wt/wt</sup> *Td-Tomato*<sup>flax/wt</sup> (WT) and *Dicer*<sup>flax/flax</sup> *Td-Tomato*<sup>flax/wt</sup> (KO) mice co-expressing Nestin (upper panel), SOX2 (middle panel) or GS (bottom panel) 2 months after Split-Cre virus injections. Data expressed as mean +/-SEM. N= 4-6 mice per group. Scale bar = 20µm. Unpaired-*t-test* \*p < 0.05. D: aNSCs cultured in proliferative conditions express stem cell markers such as SOX2 (i), GFAP (ii) and Nestin (iii). aNSCs do not express markers of glial differentiation such as S100b (iv) and O4 (vii); or markers of neuronal differentiation such as DCX (v) and Tuj1 (vi). Mouse Adult Neurons show the staining for DCX (viii) and Tuj1 (ix) as positive controls. Scale bar = 50µm.

**Figure S2. Related to Figure 2 and Figure 3.**

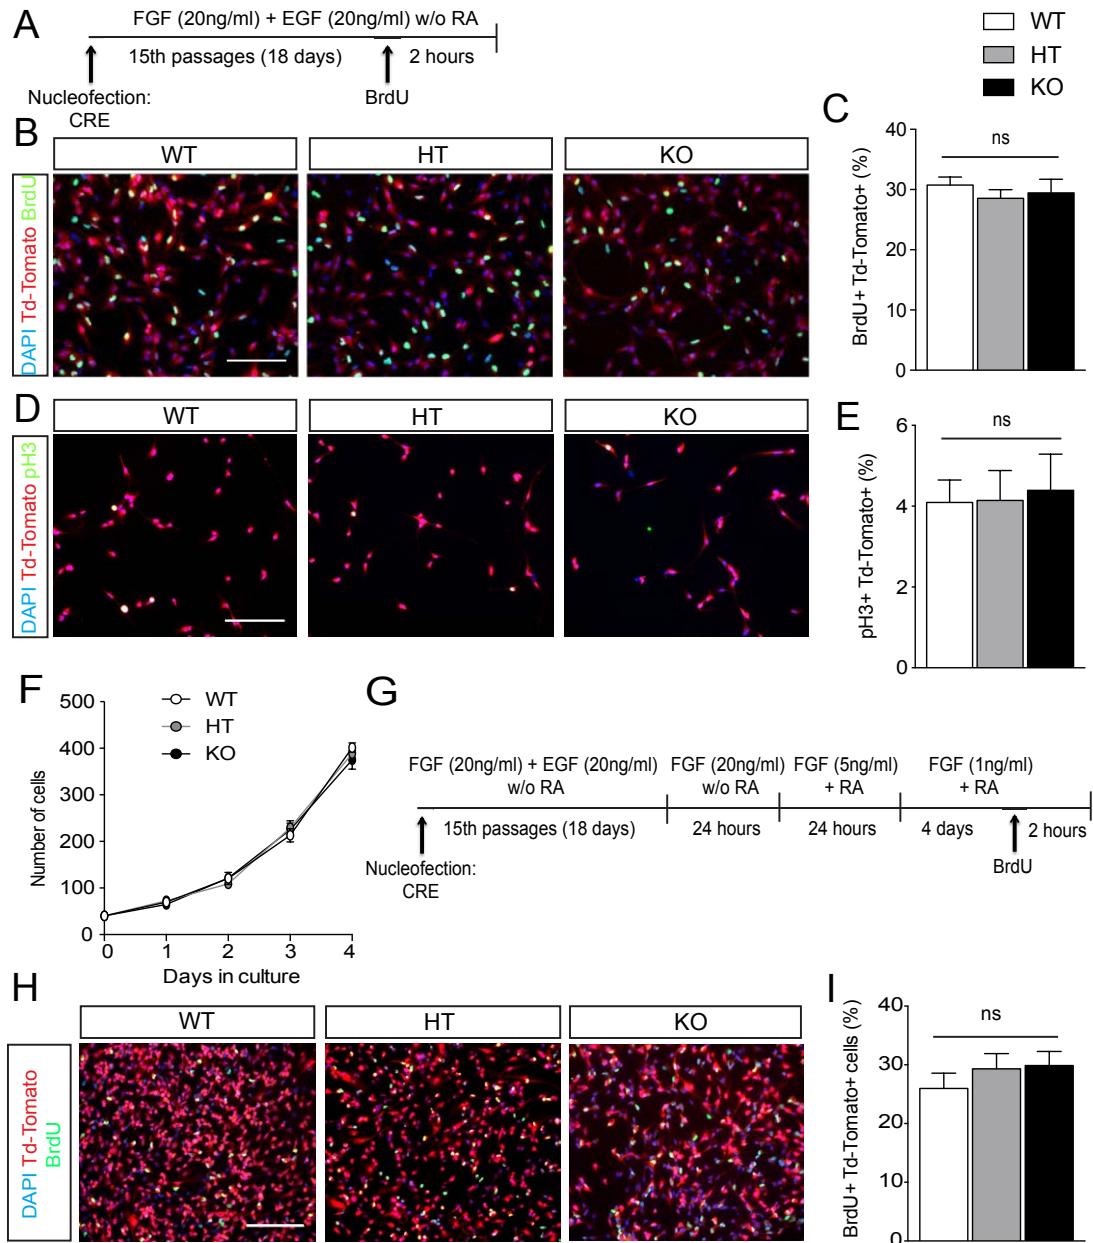

**Figure S2. Dicer/miRNA depletion does not affect aNSCs proliferation *in vitro*.** A: Schematic representation of the procedure used to assess proliferation after Dicer ablation. B and D: Representative micrographs showing Td-Tomato+ aNSCs from *Dicer*<sup>wt/wt</sup> *Td-Tomato*<sup>fllox/wt</sup> (WT), *Dicer*<sup>fllox/wt</sup> *Td-Tomato*<sup>fllox/wt</sup> (HT) and *Dicer*<sup>fllox/fllox</sup> *Td-Tomato*<sup>fllox/wt</sup> (KO) mice expressing BrdU (B and H) or pH3 (D). C and E: Percentage of Td-Tomato+ cells expressing BrdU after a 2 hours pulse (C) or pH3 (E). F: Growth curve representing the number of cells per field along days of aNSCs under proliferating conditions. G: Schematic representation of the procedure used to assess proliferation under differentiating conditions. I: Percentage of Td-Tomato+ cells expressing BrdU. Scale bar = 50µm. Data expressed as mean +/-SEM. N= 3 independent experiments containing 3 replicates. One-way ANOVA Bonferroni as *post-hoc*.

Figure S3. Related to Figure 2.

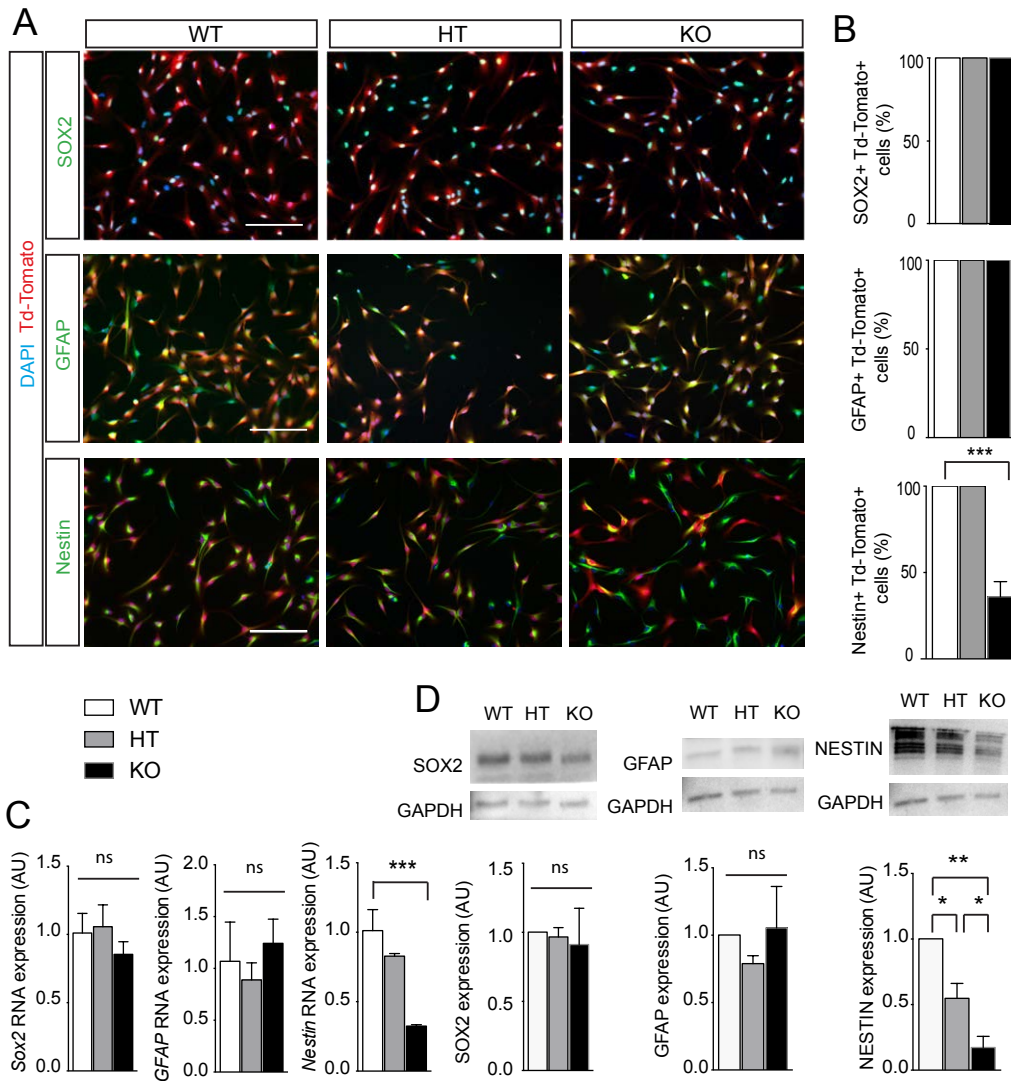

**Figure S3. Dicer/miRNA depletion does not affect the expression of aNSCs markers Sox2 and GFAP but impairs Nestin expression *in vitro*.** A: Representative micrographs showing recombined aNSCs (Td-Tomato+) from *Dicer*<sup>wt/wt</sup> *Td-Tomato*<sup>fllox/wt</sup> (WT), *Dicer*<sup>fllox/wt</sup> *Td-Tomato*<sup>fllox/wt</sup> (HT) and *Dicer*<sup>fllox/fllox</sup> *Td-Tomato*<sup>fllox/wt</sup> (KO) mice expressing SOX2 (upper panels), GFAP (middle panels) and Nestin (bottom panels). B: Percentage of Td-Tomato+ cells expressing aNSCs markers (SOX2, GFAP and Nestin). C: Relative *Sox2*, *GFAP* and *Nestin* mRNA quantification with qPCR from recombined aNSCs. D: SOX2, GFAP and NESTIN protein quantification from recombined aNSCs cultures. Scale bar = 50µm. Data expressed as mean +/-SEM. N= 3 independent experiments containing 3 replicates. One-way ANOVA Bonferroni as *post-hoc* \* p < 0.05; \*\* p < 0.01; \*\*\* p < 0.001

**Figure S4. Related to Figure 3.**

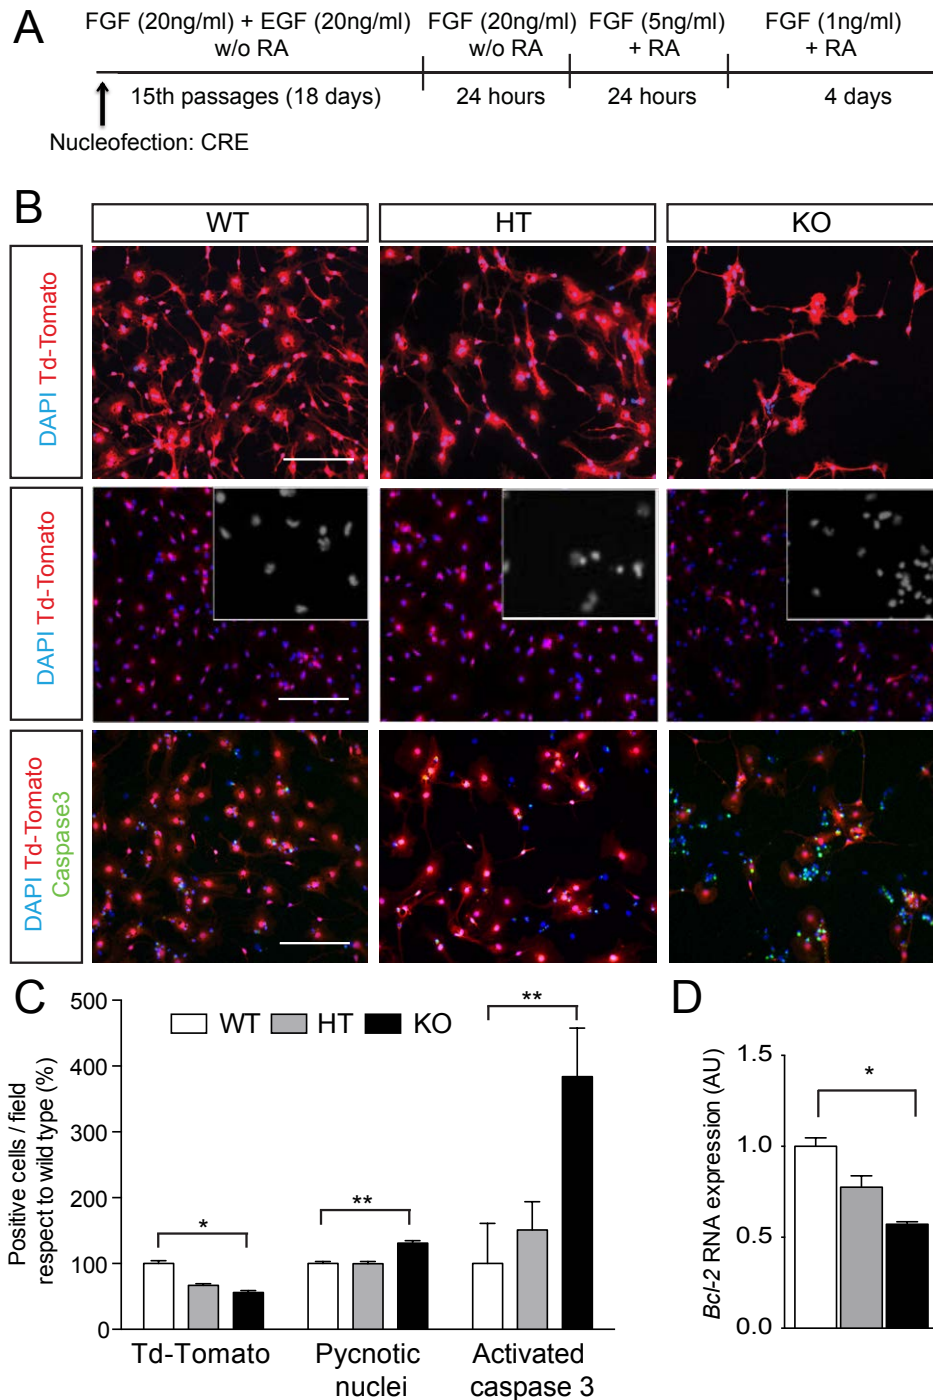

**Figure S4. *Dicer*/miRNA depletion increases apoptosis of hippocampal aNSCs upon differentiation *in vitro*.** A: Schematic representation of the procedure used to assess survival after *Dicer* ablation. B: Representative micrographs showing Td-Tomato+ aNSCs after 6 DIV with growth factors titration from *Dicer*<sup>wt/wt</sup> *Td-Tomato*<sup>flax/wt</sup> (WT), *Dicer*<sup>flax/wt</sup> *Td-Tomato*<sup>flax/wt</sup> (HT) and *Dicer*<sup>flax/flax</sup> *Td-Tomato*<sup>flax/wt</sup> (KO) mice that are surviving (upper panels), dying with pycnotic nuclei (middle panels) and expressing activated caspase 3 (bottom panels). C: Percentage of Td-Tomato+ cells, pycnotic nuclei and Td-Tomato+ cells expressing activated caspase 3 per field normalized per WT aNSCs after 6DIV. D: Relative *Bcl-2* mRNA quantification with qPCR from recombined aNSCs after 6DIV. Scale bar = 50 $\mu$ m. Data expressed as mean  $\pm$  SEM. N= 3 independent experiments containing 3 replicates. One-way ANOVA Bonferroni as *post-hoc* \**p* < 0.05; \*\**p* < 0.01; \*\*\**p* < 0.001.



Figure S5. Related to Figure 5.

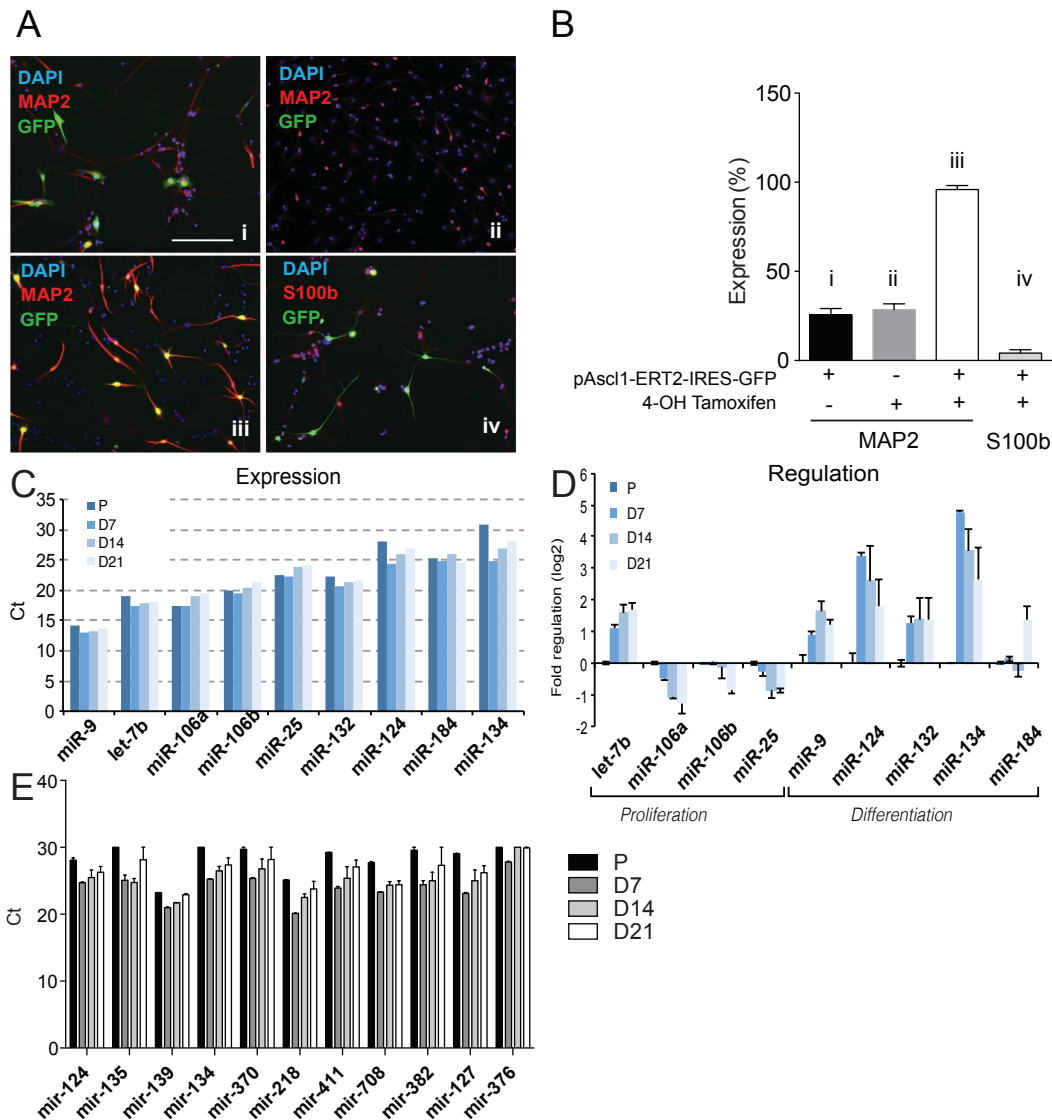

**Figure S5. Expression of neurogenesis-induced miRNAs in differentiated hippocampal aNSCs using an inducible retrovirus expressing Ascl1 (*Ascl1-ERT2-IRES-GFP*).** After 6 DIV, upon 4-OH tamoxifen administration, 95% of infected cells (GFP+) differentiate to neurons. **A:** Representative micrographs showing the efficiency of neuronal differentiation upon Ascl1 expression in hippocampal aNSCs at 6 DIV. **B:** Percentage of MAP2 or S100b expressing cells respect to GFP+ infected cells (i, iii and iv) or DAPI (ii) under different conditions at 6 DIV. Scale bar = 50 μm. **C:** Expression levels of miRNAs known to be involved on neurogenesis as reported by Schouten et al., 2012. **D:** Fold regulation of known miRNAs during neuronal differentiation. **E:** Expression levels of selected miRNAs in this study during proliferation (P) or differentiation after 7 (D7), 14 (D14) and 21 (D21) DIVs. Data expressed as mean +/-SEM. N= 3 independent experiments containing 3 replicates.

**Figure S6. Related to Figure 6.**

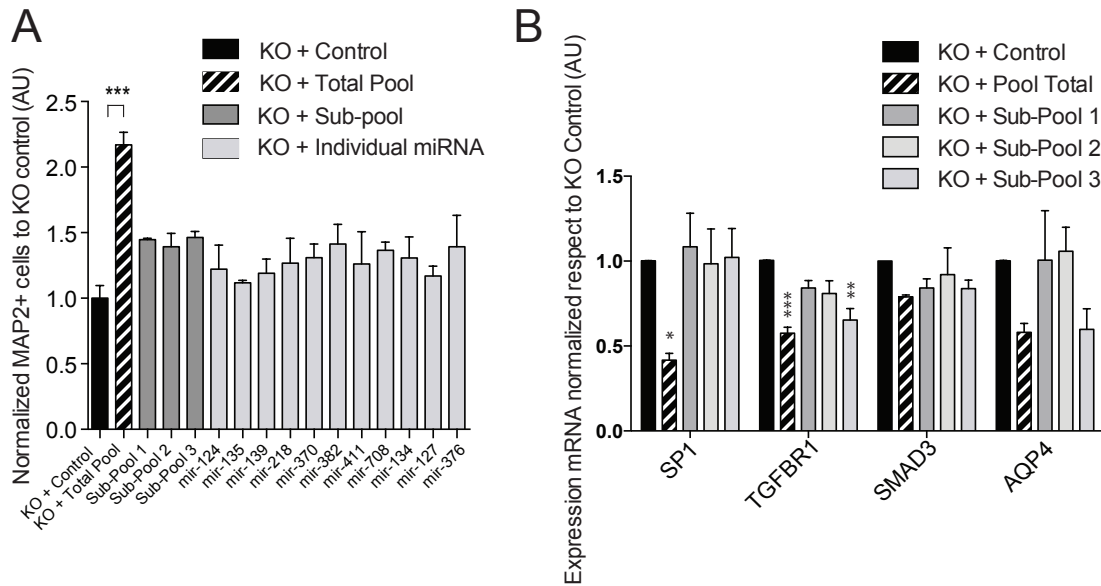

**Figure S6. A pool of eleven miRNAs synergistically rescues Dicer-cKO impairment of adult neurogenesis.** A: Proportion of KO aNSCs expressing MAP2 upon transfection of 250nM of Sub-Pool 1 (220nM scrambled RNA + 25nM mir-124-3p + 25nM mir-135a-5p), 250nM of Sub-Pool 2 (75nM scrambled RNA + 25nM mir-139-5p + 25nM mir-218-5p + 25nM mir-411-5p + 25nM mir-134-5p + 25nM mir-370-3p + 25nM mir-382-5p + 25nM mir-708-5p), 250nM of Sub-Pool 3 (220nM scrambled RNA + 25nM mir-127-3p + 25nM miR-376b-3p), or each miRNA alone (225nM scrambled RNA + 25nM specific miRNA) respect to KO control. B: Expression of mRNA with qPCR of negative regulators of neuronal differentiation or astrocyte inducers from recombined KO aNSCs transfected with 250nM of scrambled RNA, 250nM of Total Pool or Sub-pools after 6 DIV. Data expressed as mean +/-SEM. N= 3 independent experiments containing 3 replicates. One-way ANOVA Bonferroni as *post-hoc* \*p < 0.05; \*\*p < 0.01; \*\*\*p < 0.001.



**Figure S7. Related to Figure 6.**

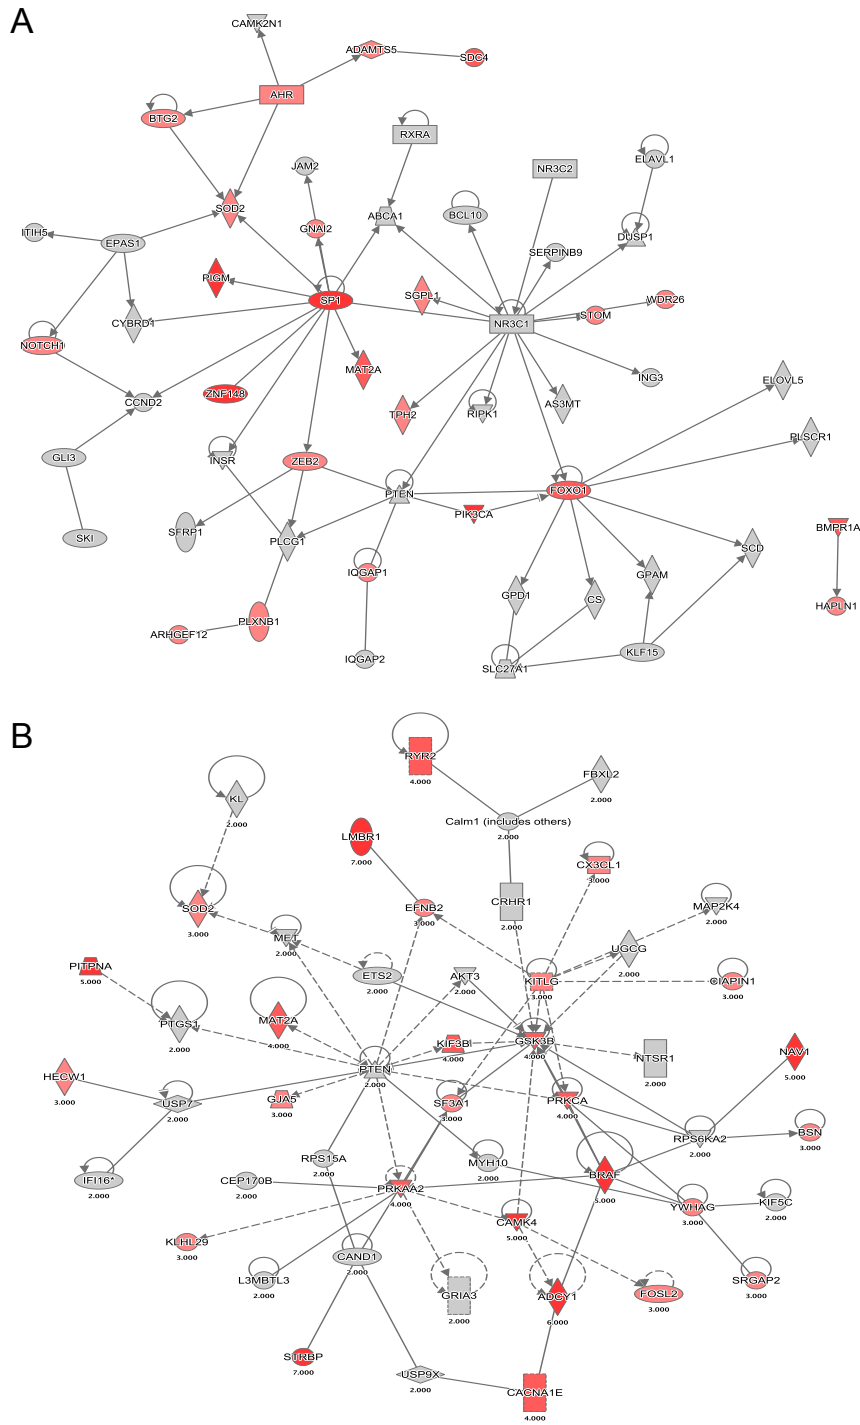

**Figure S7. Gene networks of astrocytes and neurons.** Representation of connected predicted targets of at least 2 of the eleven miRNAs (previously selected with Mirwalk 2.0) that are a hallmark of astrocytes (A) and neurons (B) as described by Cahoy et al., 2008. Genes targeted by 3 or more miRNAs are indicated in red (more intensity = more miRNAs are targeting the selected gene).

**Table S1. Related to Figure 5. Predicted targets of at least two of the eleven miRNAs selected with Mirwalk 2.0.**

**Table S2. Related to Figure 5. Predicted targets of at least five of the eleven miRNAs selected with Mirwalk 2.0.** Predicted targets known to have a role on neuronal and astrocyte differentiation are indicated.

**Table S3. Related to Figure 7. Proteomics expression raw data.**

## Supplemental experimental procedures

### Animals

Genotyping of mice carrying the *Dicer*<sup>flox</sup> allele were performed by PCR following published protocols (Andl et al., 2006); and Td-Tomato according to Jackson laboratories instructions. Animals were 6-8 weeks-old at the time of the Split-Cre viral injections, or 6-8 weeks old for aNSCs preparation.

### Virus injection

8 weeks-old mice were anesthetized with isoflurane and 1  $\mu$ l of virus mix (Split-Cre N-Cre:C-Cre) per DG was stereotaxically injected at the following coordinates:  $-2.0$  anterior/posterior,  $\pm 1.6$  medial/lateral, and  $-1.9$  to  $-2.1$  dorsal/ventral relative to bregma (in millimeters) as previously described (Beckervordersandforth et al., 2014). One month later, mice received one BrdU intraperitoneal injection per day (50mg/kg) during 5 days. Animals were sacrificed 10 days or 1 month after BrdU injections.

Mice were anesthetized with intraperitoneal administration of ketamine (90mg/kg) and xylazine (5-7mg/kg), and subsequently perfused with PBS followed by 4% paraformaldehyde (PFA). Brains were harvested, postfixed overnight in 4% PFA, and then equilibrated in 30% sucrose. 40  $\mu$ m brain sections were generated using a sliding microtome and were stored in a  $-20^{\circ}\text{C}$  freezer as floating sections in 48 well plates filled with cryoprotectant solution (glycerol, ethylene glycol, and 0.2 M phosphate buffer, pH 7.4, 1:1:2 by volume).

### aNSC preparation and culture

DG was isolated from 8-10 mice at the age of 6-8 weeks per genotype for each aNSCs culture preparation. After dissection in Hanks Balanced Salt Solution (HBSS, Gibco) medium, the tissue was enzymatically dissociated with papain (2,5U/ml), dispase (1U/ml) and DNaseI (250U/ml) for 20 min at  $37^{\circ}\text{C}$ . During incubation, the tissue was repeatedly triturated with a fire polished Pasteur pipette. The cell suspension was centrifuged at 130 g for 5 min and the pellet was re-suspended in buffer solution (1x HBSS, 30mM Glucose, 2mM HEPES pH 7,4, 26mM NaHCO<sub>3</sub>) followed by a centrifugation at 130 g for 5 min. aNSCs were isolated using 22% Percoll gradient solution. After further centrifugation for 5 min at 130 g the cell pellet was re-suspended in 2 ml of culture medium containing Neurobasal (Invitrogen), Glutamax (Invitrogen), 1% penicillin and streptomycin (Invitrogen), B27 without retinoic acid (Invitrogen), FGF (20ng/ml; PeproTech) and EGF (20ng/ml; PeproTech). The dissociated DG tissue was plated into PDL/Laminin (Sigma/Roche) coated wells and incubated at  $37^{\circ}\text{C}$  with 5% CO<sub>2</sub>. To further remove excess debris, the growth medium was exchanged 24 hours later. Every 2 days half of the growth medium was exchanged with fresh medium to replenish the growth factors. aNSCs were passaged once they reached 80% confluence.

*Proliferation medium:* Neurobasal, Glutamax, 1% penicillin and streptomycin, B27 without retinoic acid, supplemented with FGF (20ng/ml) and EGF (20ng/ml). 10  $\mu$ M BrdU (Sigma-Aldrich) was added to aNSCs in proliferation medium 2 hours before fixation.

*Neuronal differentiation:* aNSCs were plated at  $1,2 \times 10^4$  cells/cm<sup>2</sup> in culture medium supplemented with FGF (20ng/ml) 24 hours. Then medium was exchanged with medium containing B27 with retinoic acid and FGF (5ng/ml) for 24 hours and FGF (1ng/ml) during the next four days. Cells were differentiated in culture for 6 Days in vitro (DIV).

*Astrocyte differentiation medium:* aNSCs were plated at a density of  $1,2 \times 10^4$  cells/cm<sup>2</sup> in growth medium with 10% FBS without growth factors for 6 DIV.

*Retrovirus-mediated inducible neuronal differentiation:* viral construct expressing Ascl1-ERT2 and infections conditions were previously described (Braun et al., 2013). Neuronal differentiation was induced by growth factor withdrawal in the presence of 0.5 mM OH-TAM (Sigma) for 2 days. The medium was changed every 2–3 days. Cells were fixed at 7, 14 or 21 days after the exposition to OH-TAM.

*MiRNA administration:* aNSCs from *Dicer*<sup>flox/flox</sup> Td-Tomatoflox/wt (KO) mice were transfected under proliferating conditions using Amaxa (Lonza) with 250nM of scrambled RNA, Total Pool (25nM of each miRNA), 250nM of Sub-Pool 1 (220nM scrambled RNA + 25nM mir-124-3p + 25nM mir-135a-5p), 250nM of Sub-Pool 2 (75nM scrambled RNA + 25nM mir-139-5p + 25nM mir-218-5p + 25nM mir-411-5p + 25nM mir-134-5p + 25nM mir-370-3p + 25nM mir-382-5p + 25nM mir-708-5p), 250nM of Sub-Pool 3 (220nM scrambled RNA + 25nM mir-127-3p + 25nM miR-376b-3p), each miRNA alone (225nM scrambled RNA + 25nM specific miRNA) or a pool of 10 miRNA by the withdrawal of individual miRNAs (25nM scrambled RNA + 225nM of 10 miRNA).

**MiRNA mimics used for Nucleofection**

| <b>miRIDIAN microRNA</b> | <b>Reference Dharmacon</b> |
|--------------------------|----------------------------|
| mmu-miR-135a-5p          | C-310411-05-0002           |
| mmu-miR-376b-3p          | C-310616-07-0002           |
| mmu-miR-139-5p           | C-310568-07-0002           |
| mmu-miR-218-5p           | C-310576-05-0002           |
| mmu-miR-411-5p           | C-310822-01-0002           |
| mmu-miR-127-3p           | C-310397-07-0002           |
| mmu-miR-134-5p           | C-310409-05-0002           |
| mmu-miR-370-3p           | C-310619-07-0002           |
| mmu-miR-382-5p           | C-310607-05-0002           |
| mmu-miR-708-5p           | C-310987-01-0002           |
| mmu-miR-124-3p           | C-310391-05-0002           |

**MiRNA antagonists used for Nucleofection**

| <b>miRIDIAN microRNA Harpin Inhibitor</b> | <b>Reference Dharmacon</b> |
|-------------------------------------------|----------------------------|
| mmu-miR-135a-5p                           | IH-310411-07-0002          |
| mmu-miR-376b-3p                           | IH-310616-08-0002          |
| mmu-miR-139-5p                            | IH-310568-08-0002          |
| mmu-miR-218-5p                            | IH-310575-07-0002          |
| mmu-miR-411-5p                            | IH-310822-02-0002          |
| mmu-miR-127-3p                            | IH-310397-08-0002          |
| mmu-miR-134-5p                            | IH-310409-07-0002          |
| mmu-miR-370-3p                            | IH-310619-08-0002          |
| mmu-miR-382-5p                            | IH-310607-07-0002          |
| mmu-miR-708-5p                            | IH-310987-02-0002          |
| mmu-miR-124-3p                            | IH-310390-07-0002          |

**Immunofluorescence**

The immunofluorescence staining on brain slices was performed on sections covering the entire dorsal hippocampus (Bregma, -1.06 to -2.18 mm, Paxinos and Franklin, 2001). Sections were washed with 0.1M PBS during 40 min and pretreated with 2N HCL at 30,2°C for 30 min. After extensive washings with 0.1M PBS, sections were permeabilized with 0.3% PBS-T (PBS-Triton X-100) for 10 min followed with 20 min with 0.1% PBS-T. Sections were blocked during 2 h with 0.1% PBS-T and 5% FBS at room temperature (RT) followed by incubation with primary antibodies in a blocking solution overnight at 4°C. The next day, after washing extensively with 0.1% PBS-T sections were subsequently incubated for 1 h with the corresponding secondary fluorescent antibodies (1/1000; Goat or donkey Alexa 488, 568, and 647nm, Invitrogen). Sections were counterstained with Hoechst (1:300), mounted and cover slipped with mowiol reagent.

The immunofluorescence staining on cell cultures was performed after fixing aNSCs for 30 min with 4% paraformaldehyde (PFA) followed by extensive washings with PBS during 30 min. Cells were washed three times with PBS 0,1% Triton X-100 (PBS-T) and blocked during 2 hours with PBS-T containing 5% normal goat serum (Vector laboratories), followed by overnight incubation with primary antibodies. To detect BrdU incorporation, cells were pretreated with 2M HCl for 30 min at 37°C followed by washing with borate buffer, pH 8.5, for 30 min, before being subjected to immunofluorescence. The next day, after washing extensively with PBS-T, cells were incubated with secondary antibodies. Cells were mounted in mounting medium and counterstained with fluorescent nuclear dye DAPI (Invitrogen).

**Primary Antibodies used for immunofluorescence**

| <b>Antibody</b> | <b>Host</b> | <b>Company</b> | <b>Catalog</b> | <b>Dilution</b> |
|-----------------|-------------|----------------|----------------|-----------------|
| BrdU            | rat         | Abcam          | ab-6326        | 1:200           |
| DCX             | rabbit      | Abcam          | ab18723        | 1:1000          |
| DCX             | goat        | Santacruz      | SC8066         | 1:200           |
| GFAP            | rabbit      | Dako           | Z-0334         | 1:1000          |
| S100b           | mouse       | Sigma          | S2532          | 1:250-1:500     |
| NeuN            | mouse       | Millipore      | MAB377         | 1:250           |
| GS              | mouse       | Millipore      | MAB302         | 1:400           |
| SOX2            | rabbit      | Millipore      | AB5603         | 1:200-1:500     |
| Nestin          | mouse       | Millipore      | MAB353         | 1:250           |
| Nestin          | rat         | BD-Pharmigen   | 556309         | 1:200           |
| pH3             | rat         | Abcam          | AB10543        | 1:500           |

## Primers used for gene expression analysis by quantitative PCR

| Primer Name | Sequence                 |
|-------------|--------------------------|
| Actin Fw    | GGCTGTATCCCCTCCATCG      |
| Actin Rv    | CCAGTTGGTAACAATGCCATGT   |
| Aqp4 Fw     | GAGTCACCACGGTTCATGGA     |
| Aqp4 Rv     | CGTTTGGGAATCACAGCTGGC    |
| Bcl-2 Fw    | GGTATGCACCCAGAGTGATGC    |
| Bcl-2 Rv    | ATGCCTTTGTGGAACTATATGGC  |
| Dicer Fw    | CCTGACAGTGACGGTCCAAAG    |
| Dicer Fw 2  | GGAACGCTAACACATCTACCT    |
| Dicer Rv    | CATGACTCTTCAACTCAAACCT   |
| Dicer Rv 2  | AGAGTCCATCCTGTCCTTGA     |
| GAPDH Fw    | TGCACCACCAACTGCTTAGC     |
| GAPDH Rv    | GGCATGGACTGTGGTCATGAG    |
| GFAP Fw     | GGGGCAAAGCACCAAAGAAG     |
| GFAP Rv     | GGGACAACCTGTATTGTGAGCC   |
| Nestin Fw   | CCCTGAAGTCGAGGAGCTG      |
| Nestin Rv   | CTGCTGCACCTCTAAGCGA      |
| S100b Fw    | CTGGAGAAGGCCATGGTTGC     |
| S100b Rv    | CTCCAGGAAGTGAGAGAGCT     |
| Smad3 Fw    | CTGGGCCTACTGTCCAATGT     |
| Smad3 Rv    | CATCTGGGTGAGGAC CTTGT    |
| Sp1 Fw      | GGCAATAATGGGGGTAGCGG     |
| Sp1 Rv      | CAAGCTGGCAGAACTGATGGC    |
| Tgfr1 Fw    | CATTCACCACCGTGTGCCAAATGA |
| Tgfr1 Rv    | ACCTGATCCAGACCCTGATGTTGT |

### Quantification of miRNAs

MiRNA profiling was performed on 200 ng of total RNA for each sample and Megaplex reactions were run with 12 cycles of pre-amplification. PreAmp products were diluted 1:4 in TE and 9 µl of the diluted reactions were loaded on microRNA cards. Arrays were run on a ViiA 7 Real-Time PCR system (Thermo Fisher). Raw data were exported to excel to be further analyzed. First, miRNA expression was normalized by using scaling factors calculated by median-centering the Cq values of the house-keeping genes included in each array (namely: U6, sno135, sno202, U87 and Y1). Undetermined values or Cq values >30.01 were arbitrarily set to 30.01, without any further normalization. Next, the scaled Cq values were centered on the median expression over all samples (Proliferating aNSCs, differentiating at DIV7, DIV14, DIV21). These values were used for hierarchical clustering analysis in Figure 6.

MiRNA quantification from FACS sorted Td-Tomato+ cells two months after the Split-Cre injection in WT and Dicer cKO mice was performed using the miScript Primer Assay (Qiagen) following the manufacturer's instructions.

### In silico analysis

Predicted target analysis was performed with the miRWalk 2.0 platform with highly restrictive parameters: seed sequence length of 7 bp, p value <0.01 and predicted targets for at least 8 databases including *miRWalk*, *MicroT4*, *miRanda*, *miRBridge*, *miRDB*, *miRMap*, *miRNAMap*, *PICTAR2*, *PITA*, *RNA22*, *RNAhybrid* and *Targetscan*.

Gene Ontology (GO) analysis was performed with DAVID Bioinformatics Resources v6.8 to classify the significantly dysregulated proteins into biological processes (BP).

### Expression proteomics experiments

#### Sample preparation

Transfected WT aNSCs with a pool of miRNA inhibitors (250nM) or control RNA were collected after 6 DIV in differentiation conditions (3 independent experiments). At the end of the experiment, cells were lysed with RIPA buffer and 60µg of proteins were collected from all the samples to isobarically label them using TMT sixplex kits (ThermoFisher Scientific) following the protocol suggested by the vendor. Tags 126 to 128 *m/z* were used for the control samples (3 replicates); tags 129 to 131 *m/z* were used for the miRNA inhibitor treated samples (3 replicates). Briefly, samples were reduced with dithiothreitol (DTT), alkylated with iodoacetamide (IAA) and then labeled using the TMT tags. After pooling the six conditions, half of the total protein content (180µg) was loaded on a monodimensional

gel-electrophoresis (1DGE). The whole lane was then cut into 12 slices and in-gel protein digestion was performed, according to (Shevchenko et al., 2006). The recovered samples were dried under nitrogen steam then re-dissolved with 50ul of 3% acetonitrile (ACN) with 0.1% formic acid for LC-MS/MS analysis.

#### *LC-MS/MS analysis*

The tryptic peptide mixture was analyzed using a Synapt G2 QToF instrument equipped with nanoACQUITY liquid chromatographer and a nanoSpray ion source. Peptides were separated on a BEH nanobore column (75um IDX25cm length) using a linear gradient of ACN in water from 3 to 55% in three hours, followed by a washout step at 90%ACN (10 min) and a reconditioning step to 3% for 20 min. Flow rate was set to 300 nL/min. Spray voltage was set to 1.6kV, cone voltage was set to 28V, spray gas was set to 0.3 L/min. Survey spectra were acquired over the 50-1600  $m/z$  scan range. Multiply charged ions (2+,3+ and 4+) between 300 and 1400  $m/z$  were selected as precursors for Data Dependent Acquisition (DDA) tandem mass analysis and fragmented in the Trap region of the instrument. Collision energy (CE) values were automatically selected by the software using dedicated charge-state dependent CE/ $m/z$  profiles. Every 60 seconds a single LeuEnk (2ng/ml) MS scan was acquired by the LockMass ion source for spectra recalibration.

#### *Data analysis*

Acquired raw datafiles were processed using PLGS software (Waters Inc.) to recalibrate the mass spectra and to generate the precursor-fragment peaklist. Protein identification and quantification were performed by interrogating the SwissProt database using MASCOT Server software (Matrixscience) (Shevchenko et al., 2006). The search parameters were set as follows, quantification: TMT6plex; fixed modifications: carbamidomethyl (C), TMT6plex (K); variable modifications: acetyl (K), acetyl (N-term), TMT6plex (N-terminus); deamidated (NQ), methyl (DE), oxidation (M), phospho (ST), phospho (Y); peptide tolerance: 50ppm; fragment tolerance: 0.5Da; maximum allowed missed cleavages: 2. At least 2 peptides were required for a positive protein identification and quantification. Protein expression ratio was normalized by the average ratio off all the peptides assigned to proteins.



## Supplemental references

- Andl, T., Murchison, E.P., Liu, F., Zhang, Y., Yunta-Gonzalez, M., Tobias, J.W., Andl, C.D., Seykora, J.T., Hannon, G.J., and Millar, S.E. (2006). The miRNA-processing enzyme dicer is essential for the morphogenesis and maintenance of hair follicles. *Curr. Biol.* CB 16, 1041–1049.
- Chuikov, S., Levi, B.P., Smith, M.L., and Morrison, S.J. (2010). Prdm16 promotes stem cell maintenance in multiple tissues, partly by regulating oxidative stress. *Nat. Cell Biol.* 12, 999–1006.
- Deneen, B., Ho, R., Lukaszewicz, A., Hochstim, C.J., Gronostajski, R.M., and Anderson, D.J. (2006). The transcription factor NFIA controls the onset of gliogenesis in the developing spinal cord. *Neuron* 52, 953–968.
- Dweep, H et al. miRWalk2.0: a comprehensive atlas of microRNA-target interactions, *Nature Methods*, 12(8): 697-697 (2015).
- Guadaño-Ferraz, A., Obregón, M.J., Germain, D.L.S., and Bernal, J. (1997). The type 2 iodothyronine deiodinase is expressed primarily in glial cells in the neonatal rat brain. *Proc. Natl. Acad. Sci. U. S. A.* 94, 10391–10396.
- Huang, Y.-C., Shih, H.-Y., Lin, S.-J., Chiu, C.-C., Ma, T.-L., Yeh, T.-H., and Cheng, Y.-C. (2015). The epigenetic factor Kmt2a/Mll1 regulates neural progenitor proliferation and neuronal and glial differentiation. *Dev. Neurobiol.* 75, 452–462.
- Kaul, A., Chen, Y.-H., Emmett, R.J., Gianino, S.M., and Gutmann, D.H. (2013). Conditional KIAA1549: BRAF mice reveal brain region- and cell type-specific effects. *Genes.* N. Y. N 2000 51, 708–716.
- Li, X., Law, J.W.S., and Lee, A.Y.W. (2012). Semaphorin 5A and plexin-B3 regulate human glioma cell motility and morphology through Rac1 and the actin cytoskeleton. *Oncogene* 31, 595–610.
- Michinaga, S., Ishida, A., Takeuchi, R., and Koyama, Y. (2013). Endothelin-1 stimulates cyclin D1 expression in rat cultured astrocytes via activation of Sp1. *Neurochem. Int.* 63, 25–34.
- Olsen, M.L., and Sontheimer, H. (2008). Functional implications for Kir4.1 channels in glial biology: from K<sup>+</sup> buffering to cell differentiation. *J. Neurochem.* 107, 589–601.
- Paxinos G, Franklin KBJ (2001) *The Mouse Brain in Stereotaxic Coordinates: Second Edition.* Elsevier Academic Press, San Diego, CA. 10.1111/j.1469-7580.2004.00264.x.
- Shen, T., Sun, C., Zhang, Z., Xu, N., Duan, X., Feng, X.-H., and Lin, X. (2014). Specific control of BMP signaling and mesenchymal differentiation by cytoplasmic phosphatase PPM1H. *Cell Res.* 24, 727–741.
- Sim, F.J., McClain, C., Schanz, S., Protack, T.L., Windrem, M.S., and Goldman, S.A. (2011). CD140a identifies a population of highly myelinogenic, migration-competent, and efficiently engrafting human oligodendrocyte progenitor cells. *Nat. Biotechnol.* 29, 934–941.
- Stipursky, J., and Gomes, F.C.A. (2007). TGF- $\beta$ 1/SMAD signaling induces astrocyte fate commitment in vitro: Implications for radial glia development. *Glia* 55, 1023–1033.
- Sun, M., Forsman, C., Sergi, C., Gopalakrishnan, R., O'Connor, M.B., and Petryk, A. (2010). The expression of Twisted gastrulation in postnatal mouse brain and functional implications. *Neuroscience* 169, 920–931.
- Zeng, X.-N., Sun, X.-L., Gao, L., Fan, Y., Ding, J.-H., and Hu, G. (2007). Aquaporin-4 deficiency down-regulates glutamate uptake and GLT-1 expression in astrocytes. *Mol. Cell. Neurosci.* 34, 34–39.
- Zhang, Y., Zhang, J., Navrazhina, K., Argaw, A.T., Zameer, A., Gurfein, B.T., Brosnan, C.F., and John, G.R. (2010). TGF $\beta$ 1 induces Jagged1 expression in astrocytes via ALK5 and Smad3 and regulates the balance between oligodendrocyte progenitor proliferation and differentiation. *Glia* 58, 964–974

Table S2. Predicted targets of at least five of the eleven miRNAs selected with Mirwalk 2.0. Related to Figure 5.

| Predicted targets of > 5 miRNAs |                |                |                 |                |                |                |                |                |                |                |                 |                  |
|---------------------------------|----------------|----------------|-----------------|----------------|----------------|----------------|----------------|----------------|----------------|----------------|-----------------|------------------|
| Gene name                       | mmu-miR-124-3p | mmu-miR-127-3p | mmu-miR-135a-5p | mmu-miR-134-5p | mmu-miR-139-5p | mmu-miR-218-5p | mmu-miR-370-3p | mmu-miR-382-5p | mmu-miR-411-5p | mmu-miR-708-5p | mmu-miR-376b-3p | Number of miRNAs |
| Adcy1                           | Adcy1          |                | Adcy1           |                | Adcy1          | Adcy1          |                | Adcy1          |                | Adcy1          |                 | 6                |
| Afap1                           | Afap1          |                | Afap1           |                |                |                | Afap1          |                |                | Afap1          | Afap1           | 5                |
| Amot1                           |                | Amot1          |                 | Amot1          |                | Amot1          |                | Amot1          |                |                | Amot1           | 5                |
| Aqp4                            |                |                | Aqp4            |                |                | Aqp4           |                | Aqp4           |                | Aqp4           | Aqp4            | 6                |
| Arhgef6                         | Arhgef6        | Arhgef6        |                 |                |                | Arhgef6        | Arhgef6        |                |                |                | Arhgef6         | 5                |
| Arih1                           |                | Arih1          |                 |                | Arih1          |                |                | Arih1          |                |                | Arih1           | 5                |
| Bcl2l13                         |                |                |                 | Bcl2l13        |                |                | Bcl2l13        | Bcl2l13        |                | Bcl2l13        |                 | 5                |
| Braf                            | Braf           |                |                 | Braf           |                | Braf           |                | Braf           |                |                | Braf            | 5                |
| Camk4                           |                |                | Camk4           | Camk4          | Camk4          | Camk4          |                |                |                |                | Camk4           | 5                |
| Cask                            | Cask           |                |                 |                | Cask           | Cask           |                | Cask           |                |                | Cask            | 5                |
| Cntn2                           | Cntn2          | Cntn2          |                 |                | Cntn2          | Cntn2          |                |                |                | Cntn2          | Cntn2           | 6                |
| Coa5                            |                | Coa5           | Coa5            |                | Coa5           | Coa5           |                |                |                |                | Coa5            | 5                |
| Csnk1g1                         |                | Csnk1g1        |                 |                | Csnk1g1        |                |                | Csnk1g1        |                | Csnk1g1        |                 | 5                |
| D430041D05Rik                   |                | D430041D05Rik  |                 | D430041D05Rik  |                | D430041D05Rik  | D430041D05Rik  |                |                | D430041D05Rik  |                 | 5                |
| Dcbl2                           |                |                | Dcbl2           | Dcbl2          | Dcbl2          |                |                | Dcbl2          |                | Dcbl2          |                 | 5                |
| Ddx3x                           | Ddx3x          | Ddx3x          |                 | Ddx3x          |                | Ddx3x          | Ddx3x          |                |                |                |                 | 5                |
| Dhfr                            |                |                | Dhfr            |                | Dhfr           | Dhfr           |                |                |                |                | Dhfr            | 5                |
| Dio2                            |                | Dio2           |                 |                |                |                | Dio2           | Dio2           |                | Dio2           |                 | 6                |
| Dock5                           |                | Dock5          | Dock5           |                |                | Dock5          |                | Dock5          |                | Dock5          |                 | 6                |
| Eif5b                           |                | Eif5b          |                 |                |                | Eif5b          | Eif5b          |                | Eif5b          | Eif5b          |                 | 5                |
| Eri1                            |                | Eri1           |                 |                | Eri1           |                |                | Eri1           |                |                | Eri1            | 5                |
| Faf2                            | Faf2           |                |                 | Faf2           | Faf2           | Faf2           |                |                |                | Faf2           |                 | 5                |
| Fut9                            |                | Fut9           |                 | Fut9           | Fut9           |                |                | Fut9           | Fut9           |                | Fut9            | 6                |
| Gm608                           |                | Gm608          | Gm608           |                |                | Gm608          |                |                |                | Gm608          |                 | 5                |
| Grk1                            |                | Grk1           | Grk1            |                |                | Grk1           |                |                |                | Grk1           |                 | 5                |
| Homer2                          | Homer2         |                |                 | Homer2         |                | Homer2         | Homer2         |                |                |                | Homer2          | 5                |
| Hook3                           |                | Hook3          | Hook3           |                | Hook3          | Hook3          | Hook3          |                |                | Hook3          |                 | 7                |
| Hs3st3b1                        |                |                | Hs3st3b1        | Hs3st3b1       | Hs3st3b1       | Hs3st3b1       | Hs3st3b1       |                |                |                |                 | 5                |
| Hus1                            |                |                | Hus1            |                | Hus1           | Hus1           | Hus1           |                |                | Hus1           |                 | 5                |
| Iws1                            |                | Iws1           |                 |                |                | Iws1           |                | Iws1           |                | Iws1           | Iws1            | 6                |
| Kcna1                           |                |                | Kcna1           | Kcna1          | Kcna1          | Kcna1          |                |                |                |                | Kcna1           | 6                |
| Kcnc1                           |                |                | Kcnc1           | Kcnc1          | Kcnc1          | Kcnc1          |                |                |                | Kcnc1          | Kcnc1           | 7                |
| Kmt2a                           |                | Kmt2a          |                 |                | Kmt2a          | Kmt2a          |                |                |                | Kmt2a          |                 | 5                |
| Limd2                           |                |                |                 | Limd2          | Limd2          | Limd2          | Limd2          |                |                |                |                 | 5                |
| Lmbr1                           |                |                | Lmbr1           |                | Lmbr1          | Lmbr1          | Lmbr1          | Lmbr1          |                | Lmbr1          | Lmbr1           | 7                |
| Lpar2                           |                | Lpar2          | Lpar2           |                | Lpar2          | Lpar2          |                |                |                |                |                 | 5                |
| Lpp                             |                | Lpp            |                 |                | Lpp            |                |                |                |                | Lpp            | Lpp             | 6                |
| Lrrc15                          | Lrrc15         | Lrrc15         | Lrrc15          | Lrrc15         | Lrrc15         |                | Lrrc15         |                |                |                |                 | 5                |
| Luzp1                           |                | Luzp1          | Luzp1           |                | Luzp1          |                |                |                |                | Luzp1          |                 | 5                |
| Man2a1                          |                | Man2a1         |                 |                | Man2a1         |                |                |                |                | Man2a1         | Man2a1          | 5                |
| Map3k1                          |                |                |                 | Map3k1         |                | Map3k1         |                | Map3k1         |                | Map3k1         |                 | 5                |
| Mat2a                           |                | Mat2a          | Mat2a           |                | Mat2a          |                |                |                |                | Mat2a          |                 | 5                |
| Mtmr1                           |                | Mtmr1          |                 |                | Mtmr1          |                |                | Mtmr1          |                | Mtmr1          | Mtmr1           | 5                |
| Nfib                            |                |                | Nfib            | Nfib           |                |                |                | Nfib           |                |                | Nfib            | 5                |
| Pcnx                            |                |                | Pcnx            |                | Pcnx           |                | Pcnx           | Pcnx           |                | Pcnx           |                 | 5                |
| Pdpk1                           |                |                |                 | Pdpk1          |                |                | Pdpk1          | Pdpk1          |                | Pdpk1          |                 | 5                |
| Pdzd2                           |                |                | Pdzd2           |                | Pdzd2          | Pdzd2          |                |                |                | Pdzd2          | Pdzd2           | 5                |
| Pigm                            |                | Pigm           |                 | Pigm           | Pigm           |                |                | Pigm           |                | Pigm           |                 | 5                |
| Pik3c2a                         |                | Pik3c2a        | Pik3c2a         |                | Pik3c2a        |                |                |                | Pik3c2a        |                |                 | 5                |
| Pitpna                          |                |                | Pitpna          | Pitpna         |                |                | Pitpna         |                |                | Pitpna         |                 | 5                |
| Ppm1h                           |                | Ppm1h          | Ppm1h           |                |                |                | Ppm1h          | Ppm1h          |                |                |                 | 5                |

|                |                |                |                |                |                |                |                |                |                |                |   |
|----------------|----------------|----------------|----------------|----------------|----------------|----------------|----------------|----------------|----------------|----------------|---|
| <i>Ppp1r9a</i> |                | <i>Ppp1r9a</i> |                | <i>Ppp1r9a</i> | <i>Ppp1r9a</i> | <i>Ppp1r9a</i> | <i>Ppp1r9a</i> | <i>Ppp1r9a</i> | <i>Ppp1r9a</i> |                | 6 |
| <i>Prdm16</i>  | <i>Prdm16</i>  | <i>Prdm16</i>  |                | <i>Prdm16</i>  | <i>Prdm16</i>  | <i>Prdm16</i>  | <i>Prdm16</i>  | <i>Prdm16</i>  | <i>Prdm16</i>  |                | 6 |
| <i>Prkca</i>   |                | 5 |
| <i>Ptpn14</i>  |                | 8 |
| <i>Rab6b</i>   |                | 5 |
| <i>Sema3d</i>  |                | 5 |
| <i>Sema5a</i>  |                | 6 |
| <i>Sertad2</i> |                | 5 |
| <i>Sertad4</i> |                | 5 |
| <i>Setd7</i>   |                | 6 |
| <i>Slc44a5</i> |                | 5 |
| <i>Slc4a8</i>  |                | 6 |
| <i>Slc5a3</i>  |                | 6 |
| <i>Slc7a14</i> |                | 5 |
| <i>Smad3</i>   |                | 5 |
| <i>Smcr8</i>   |                | 5 |
| <i>Sp1</i>     |                | 5 |
| <i>Srp54b</i>  |                | 5 |
| <i>Sspn</i>    |                | 5 |
| <i>Ssr1</i>    |                | 5 |
| <i>St8sia1</i> | 6 |
| <i>Stk38l</i>  | 6 |
| <i>Tbl1xr1</i> | 5 |
| <i>Tgfb1</i>   | 5 |
| <i>Tnrc6b</i>  | 5 |
| <i>Tspan11</i> | 6 |
| <i>Twsg1</i>   | 6 |
| <i>Ubn2</i>    | 5 |
| <i>Xpo7</i>    | 5 |
| <i>Zdhhc21</i> | 5 |
| <i>Zfand3</i>  | 5 |
| <i>Zfp148</i>  | 5 |
| <i>Zfp275</i>  | 5 |
| <i>Zfp704</i>  | 5 |
| <i>Zfyve27</i> | 5 |
| <i>Zkscan8</i> | 5 |
| <i>Zmat3</i>   | 5 |

| Genes involved in neurogenesis or gliogenesis predicted targets of > 5 miRNAs |                |                 |                |                |                |                |                |                |                |                 |                |                             |
|-------------------------------------------------------------------------------|----------------|-----------------|----------------|----------------|----------------|----------------|----------------|----------------|----------------|-----------------|----------------|-----------------------------|
| Gene name                                                                     | mmu-miR-124-3p | mmu-miR-135a-5p | mmu-miR-382-5p | mmu-miR-134-5p | mmu-miR-411-5p | mmu-miR-218-5p | mmu-miR-370-3p | mmu-miR-708-5p | mmu-miR-139-5p | mmu-miR-376b-3p | mmu-miR-127-3p | References                  |
| <i>Aqp4</i>                                                                   |                | <i>Aqp4</i>     | <i>Aqp4</i>    | <i>Aqp4</i>    | <i>Aqp4</i>    | <i>Aqp4</i>    | <i>Aqp4</i>    | <i>Aqp4</i>    | <i>Aqp4</i>    | <i>Aqp4</i>     | <i>Aqp4</i>    | Zeng et al., 2007           |
| <i>Braf</i>                                                                   |                | <i>Braf</i>     | <i>Braf</i>    | <i>Braf</i>    | <i>Braf</i>    | <i>Braf</i>    | <i>Braf</i>    | <i>Braf</i>    | <i>Braf</i>    | <i>Braf</i>     | <i>Braf</i>    | Kaul et al., 2013           |
| <i>Dio2</i>                                                                   |                | <i>Dio2</i>     | <i>Dio2</i>    | <i>Dio2</i>    | <i>Dio2</i>    | <i>Dio2</i>    | <i>Dio2</i>    | <i>Dio2</i>    | <i>Dio2</i>    | <i>Dio2</i>     | <i>Dio2</i>    | Guadaño-Ferraz et al., 1997 |
| <i>Kcna1</i>                                                                  |                | <i>Kcna1</i>    | <i>Kcna1</i>   | <i>Kcna1</i>   | <i>Kcna1</i>   | <i>Kcna1</i>   | <i>Kcna1</i>   | <i>Kcna1</i>   | <i>Kcna1</i>   | <i>Kcna1</i>    | <i>Kcna1</i>   | Olsen and Sontheimer, 2008  |
| <i>Kmt2a</i>                                                                  |                | <i>Kmt2a</i>    | <i>Kmt2a</i>   | <i>Kmt2a</i>   | <i>Kmt2a</i>   | <i>Kmt2a</i>   | <i>Kmt2a</i>   | <i>Kmt2a</i>   | <i>Kmt2a</i>   | <i>Kmt2a</i>    | <i>Kmt2a</i>   | Huang et al., 2015          |
| <i>Nfib</i>                                                                   |                | <i>Nfib</i>     | <i>Nfib</i>    | <i>Nfib</i>    | <i>Nfib</i>    | <i>Nfib</i>    | <i>Nfib</i>    | <i>Nfib</i>    | <i>Nfib</i>    | <i>Nfib</i>     | <i>Nfib</i>    | Deneen et al., 2006         |
| <i>Ppm1h</i>                                                                  |                | <i>Ppm1h</i>    | <i>Ppm1h</i>   | <i>Ppm1h</i>   | <i>Ppm1h</i>   | <i>Ppm1h</i>   | <i>Ppm1h</i>   | <i>Ppm1h</i>   | <i>Ppm1h</i>   | <i>Ppm1h</i>    | <i>Ppm1h</i>   | Shen et al., 2014           |
| <i>Prdm16</i>                                                                 |                | <i>Prdm16</i>   | <i>Prdm16</i>  | <i>Prdm16</i>  | <i>Prdm16</i>  | <i>Prdm16</i>  | <i>Prdm16</i>  | <i>Prdm16</i>  | <i>Prdm16</i>  | <i>Prdm16</i>   | <i>Prdm16</i>  | Chuikov et al., 2010        |
| <i>Sema5a</i>                                                                 |                | <i>Sema5a</i>   | <i>Sema5a</i>  | <i>Sema5a</i>  | <i>Sema5a</i>  | <i>Sema5a</i>  | <i>Sema5a</i>  | <i>Sema5a</i>  | <i>Sema5a</i>  | <i>Sema5a</i>   | <i>Sema5a</i>  | Li et al., 2012             |
| <i>Smad3</i>                                                                  |                | <i>Smad3</i>    | <i>Smad3</i>   | <i>Smad3</i>   | <i>Smad3</i>   | <i>Smad3</i>   | <i>Smad3</i>   | <i>Smad3</i>   | <i>Smad3</i>   | <i>Smad3</i>    | <i>Smad3</i>   | Zhang et al., 2010          |
| <i>Sp1</i>                                                                    |                | <i>Sp1</i>      | <i>Sp1</i>     | <i>Sp1</i>     | <i>Sp1</i>     | <i>Sp1</i>     | <i>Sp1</i>     | <i>Sp1</i>     | <i>Sp1</i>     | <i>Sp1</i>      | <i>Sp1</i>     | Michinaga et al., 2013      |
| <i>St8sia1</i>                                                                |                | <i>St8sia1</i>  | <i>St8sia1</i> | <i>St8sia1</i> | <i>St8sia1</i> | <i>St8sia1</i> | <i>St8sia1</i> | <i>St8sia1</i> | <i>St8sia1</i> | <i>St8sia1</i>  | <i>St8sia1</i> | Sim et al., 2011            |
| <i>Tgfb1</i>                                                                  |                | <i>Tgfb1</i>    | <i>Tgfb1</i>   | <i>Tgfb1</i>   | <i>Tgfb1</i>   | <i>Tgfb1</i>   | <i>Tgfb1</i>   | <i>Tgfb1</i>   | <i>Tgfb1</i>   | <i>Tgfb1</i>    | <i>Tgfb1</i>   | Stipursky et al., 2007      |
| <i>Twsg1</i>                                                                  |                | <i>Twsg1</i>    | <i>Twsg1</i>   | <i>Twsg1</i>   | <i>Twsg1</i>   | <i>Twsg1</i>   | <i>Twsg1</i>   | <i>Twsg1</i>   | <i>Twsg1</i>   | <i>Twsg1</i>    | <i>Twsg1</i>   | Sun et al., 2010            |
| Number predicted targets                                                      | 11             | 10              | 7              | 7              | 6              | 8              | 8              | 8              | 6              | 4               | 2              |                             |
